# Supplementary material
Source: PubMed Central journal article supplement (PMC4407853)
Supplement: supp_db14-1132_DB141132SupplementaryData.pdf [file supp_db14-1132_DB141132SupplementaryData.pdf]

## SUPPLEMENTARY DATA

**Supplementary Figure 1. Effect of metformin versus rapamycin on caloric intake in obese/diabetic mice.** Caloric intake was measured throughout the study in C57BL/6 male mice fed the DIO diet and treated with either metformin (250mg/kg), rapamycin (2.5 mg/kg) or vehicle (0.1% DMSO in saline). The bar graph represents mean  $\pm$  SD. No differences were observed between vehicle and treatment conditions.

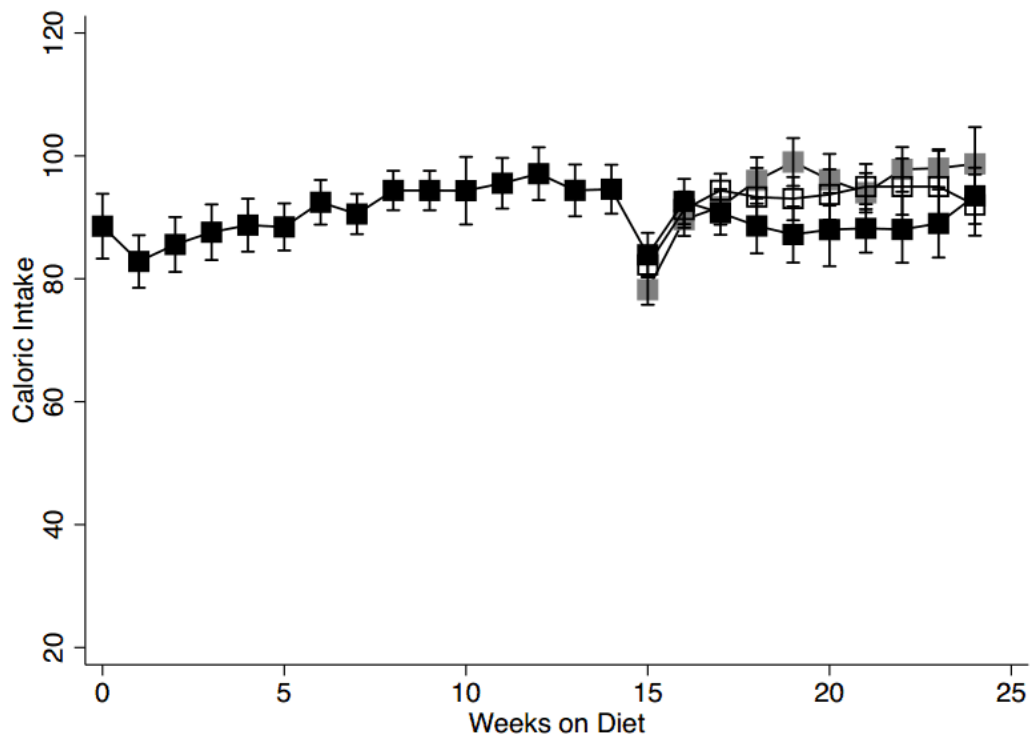

SUPPLEMENTARY DATA

**Supplementary Figure 2. Rapamycin treatment did not induce apoptosis in Panc02 cells.** (a-b) Level of DNA fragmentation was measured in Panc02 cells exposed to rapamycin (0.1 mM) or regular growth media for 24 h using a Bromodeoxyuridine (BrdU) immunofluorescence staining kit. BrdU positive cells were detected by flow cytometry (n=3/treatment). The bar graph represents percentage  $\pm$  SD. \* $p < 0.05$  by Student *t* test.

A

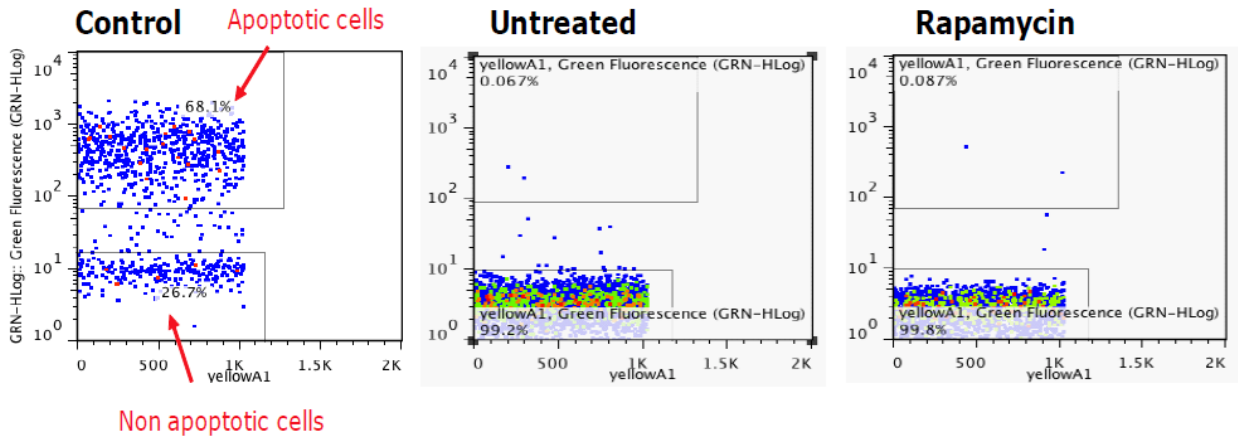

B

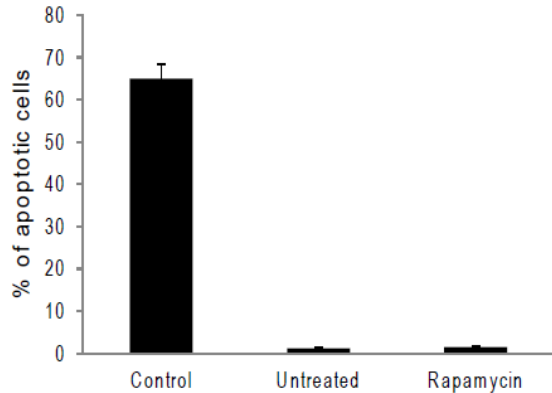

SUPPLEMENTARY DATA

**Supplementary Table 1. Screening of miRNAs expression in tumor samples treated with metformin or rapamycin in pre-diabetic obese mice.** Expression profile of highly regulated miRNAs in pancreatic cancer during obesity and diabetes performed in pancreatic tumors (n=3/group) by q-RT-PCR. Statistical analysis was performed by two-tailed Student *t* test.

| miR      | CONTROL     | RAPAMYCIN   |                | METFORMIN   |                |
|----------|-------------|-------------|----------------|-------------|----------------|
|          | Expression  | Expression  | <i>p-value</i> | Expression  | <i>p-value</i> |
| let-7b   | 1.01 ± 0.09 | 1.17 ± 0.03 | 0.15           | 0.99 ± 0.05 | 0.88           |
| miR-21   | 1.00 ± 0.03 | 1.1 ± 0.08  | 0.33           | 1.07 ± 0.03 | 0.22           |
| miR-26a  | 1.00 ± 0.07 | 1.06 ± 0.06 | 0.55           | 0.97 ± 0.02 | 0.65           |
| miR-34a  | 1.00 ± 0.05 | 0.91 ± 0.08 | 0.38           | 1.16 ± 0.04 | 0.08           |
| miR-100  | 1.00 ± 0.07 | 1.12 ± 0.07 | 0.32           | 1.02 ± 0.07 | 0.92           |
| miR-101  | 1.01 ± 0.08 | 0.81 ± 0.10 | 0.19           | 1.02 ± 0.09 | 0.9            |
| miR-146a | 1.07 ± 0.07 | 1.25 ± 0.17 | 0.42           | 1.24 ± 0.02 | 0.09           |
| miR-200a | 1.01 ± 0.04 | 0.84 ± 0.13 | 0.36           | 1.39 ± 0.78 | 0.65           |
| miR-200b | 1.01 ± 0.08 | 0.75 ± 0.14 | 0.19           | 1.21 ± 0.65 | 0.77           |
| miR-200c | 1.29 ± 0.66 | 1.03 ± 0.26 | 0.73           | 1.02 ± 0.56 | 0.78           |
